# Supplementary material
Source: publisher figshare collection journal article supplement (https://diabetesjournals.figshare.com/ndownloader/files/29093193)
Supplement: Supplementary file 1 [file 29093193]

## Supplemental Figure S1. 2-Year Attrition Diagram

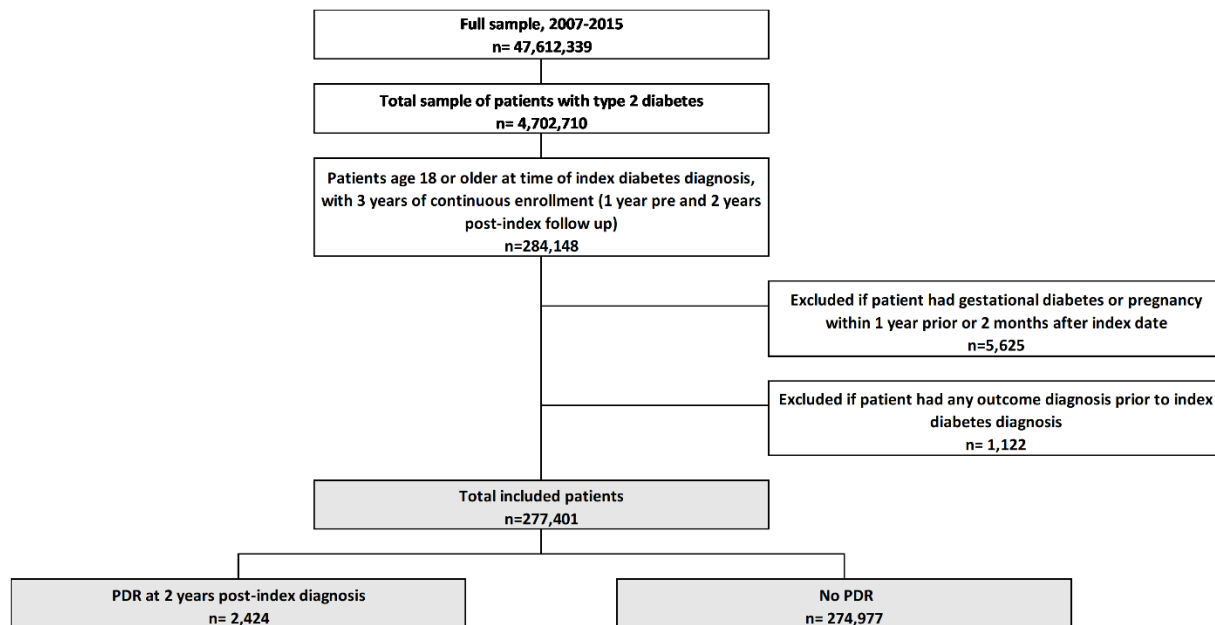

This figure demonstrates how patients were included and excluded in the 2-year cohort. Patients were included if they had any of the following: 1 inpatient claim with a diagnosis of type 2 diabetes, 1 prescription fill for diabetes medication, or 2 outpatient claims with a diagnosis of type 2 diabetes within 180 days. Only patients with an index diagnosis prior to October 1, 2013 were included to allow for 2 years of follow-up.

**Supplemental Figure S2. Cumulative Incidence of Proliferative Diabetic Retinopathy, Tractional Retinal Detachment, and Neovascular Glaucoma at 2 and 5 Years After Index**

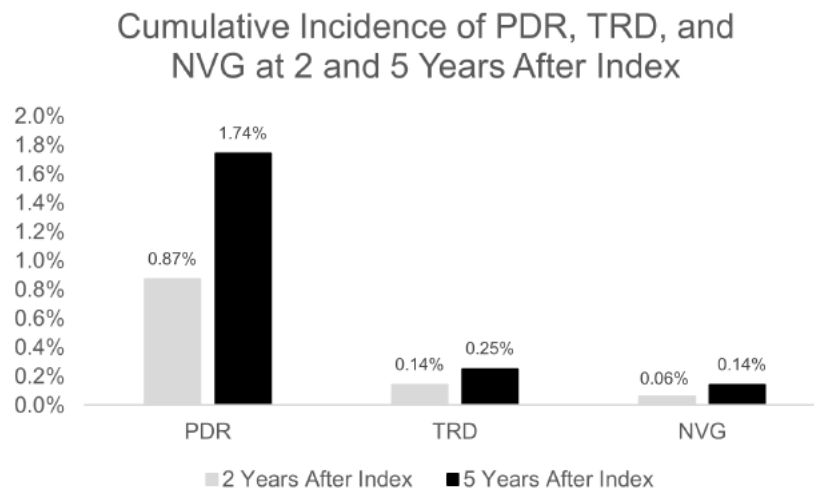

Cumulative incidence of PDR, TRD, and NVG were significantly higher at 5 years than at 2 years following index diagnosis ( $p < 0.0001$ ). PDR=proliferative diabetic retinopathy; TRD=tractional retinal detachment; NVG=neovascular glaucoma.

**Supplemental Table S1. List of medication classes used to screen for the presence of diabetes in our cohort.**

| <b>Medication Class</b>   | <b>Medication Sub-Class</b>                                           |
|---------------------------|-----------------------------------------------------------------------|
| <b>Insulins</b>           | All insulins                                                          |
| <b>Antihyperglycemics</b> | DPP-4 Inhibitors                                                      |
|                           | DPP-4 Inhibitors & HMG COA Reductase Inhibitors (Statins) Combination |
|                           | Glucocorticoid Receptor Blocker                                       |
|                           | DPP-4 Enzyme Inhibitor & Thiazolidinedione Combination                |
|                           | Sodium/Glucose Cotransporter 2 (SGLT2) Inhibitor                      |
|                           | SGLT2 Inhibitor & Biguanide Combination                               |
|                           | DPP-4 Inhibitor & Biguanide Combination                               |
|                           | Amylin Analog-Type                                                    |
|                           | Incretin Mimetic (GLP-1 Receptor Agonist)                             |
|                           | Insulin-Release Stimulant Type                                        |
|                           | Biguanide Type                                                        |
|                           | $\alpha$ -Glucosidase Inhibitors                                      |
|                           | Thiazolidinedione (PPAR- $\gamma$ Agonist)                            |
|                           | Thiazolidinedione & Sulfonylurea Combination                          |
|                           | Insulin-Release Stimulators & Biguanide Combination                   |
|                           | Thiazolidinedione & Biguanide Combination                             |
|                           | Biguanide & Dietary Supplement Combination                            |
|                           | Dopamine Receptor Agonists                                            |
|                           | SGLT-2 & DPP-4 Inhibitor Combination                                  |
| <b>Hypoglycemics</b>      | Insulin-Release Stimulant Type                                        |
|                           | Biguanide Type (Non-Sulfonylureas)                                    |
|                           | $\alpha$ -Glucosidase Inhibitor Type (N-S)                            |
|                           | Insulin-Response Enhancer (N-S)                                       |
|                           | Insulin-Response & Insulin Release Combination                        |
|                           | Insuline Release Stimulator & Biguanide (N-S) Combination             |
|                           | Insulin-Response Enhancer & Biguanide Combination                     |
|                           | Biguanide & Dietary Supplement Combination                            |

**Supplemental Table S2:** International Classification of Diseases, 9<sup>th</sup> Edition (ICD-9) and Current Procedural Terminology (CPT) codes used to identify incidence of proliferative diabetic retinopathy (PDR), tractional retinal detachment (TRD), and neovascular glaucoma (NVG)

| Outcome    | ICD-9/CPT Code   | Description                                                                                                                                                                                                                                                                                                                                                                                                                                |
|------------|------------------|--------------------------------------------------------------------------------------------------------------------------------------------------------------------------------------------------------------------------------------------------------------------------------------------------------------------------------------------------------------------------------------------------------------------------------------------|
| <b>PDR</b> | 362.02           | Proliferative diabetic retinopathy                                                                                                                                                                                                                                                                                                                                                                                                         |
|            | 379.23           | Vitreous hemorrhage                                                                                                                                                                                                                                                                                                                                                                                                                        |
|            | 67228            | Treatment of extensive or progressive retinopathy; (eg, diabetic retinopathy), photocoagulation                                                                                                                                                                                                                                                                                                                                            |
| <b>TRD</b> | 361.81           | Tractional detachment of retina                                                                                                                                                                                                                                                                                                                                                                                                            |
|            | 362.02 AND 67036 | PDR AND Vitrectomy, mechanical, pars plana approach                                                                                                                                                                                                                                                                                                                                                                                        |
|            | 362.02 AND 67039 | PDR AND Vitrectomy, mechanical, pars plana approach; with focal endolaser photocoagulation                                                                                                                                                                                                                                                                                                                                                 |
|            | 362.02 AND 67040 | PDR AND Vitrectomy, mechanical, pars plana approach; with endolaser panretinal photocoagulation                                                                                                                                                                                                                                                                                                                                            |
|            | 362.02 AND 67041 | PDR AND Vitrectomy, mechanical, pars plana approach; with removal of preretinal cellular membrane (eg, macular pucker)                                                                                                                                                                                                                                                                                                                     |
|            | 362.02 AND 67043 | PDR AND Vitrectomy, mechanical, pars plana approach; with removal of subretinal membrane (eg, choroidal neovascularization), includes, if performed, intraocular tamponade (ie, air, gas, or silicone oil) and laser photocoagulation                                                                                                                                                                                                      |
|            | 362.02 AND 67113 | PDR AND Repair of complex retinal detachment (eg, proliferative vitreoretinopathy, stage C-1 or greater, diabetic traction retinal detachment, retinopathy of prematurity, retinal tear of greater than 90 degrees), with vitrectomy and membrane peeling, including, when performed, air, gas, or silicone oil tamponade, cryotherapy, endolaser photocoagulation, drainage of subretinal fluid, scleral buckling, and/or removal of lens |
| <b>NVG</b> | 365.63           | Glaucoma associated with vascular disorders                                                                                                                                                                                                                                                                                                                                                                                                |
|            | 364.42           | Rubeosis iridis                                                                                                                                                                                                                                                                                                                                                                                                                            |
|            | 365.89 AND 66179 | Other specified glaucoma AND Aqueous shunt to extraocular equatorial plate reservoir, external approach; without graft                                                                                                                                                                                                                                                                                                                     |
|            | 365.89 AND 66180 | Other specified glaucoma AND Aqueous shunt to extraocular equatorial plate reservoir, external approach; with graft                                                                                                                                                                                                                                                                                                                        |
|            | 365.89 AND 66710 | Other specified glaucoma AND Ciliary body destruction; cyclophotocoagulation, transscleral                                                                                                                                                                                                                                                                                                                                                 |

Abbreviations: PDR=Proliferative diabetic retinopathy; TRD=Tractional retinal detachment; NVG=Neovascular glaucoma
